# Supplementary material for: A site-specific DNA methylation biosensor for both visual and magnetic determination based on lateral flow assay
Source: Royal Society of Chemistry journal article supplement (doi:10.1039/d0an02277b), 2021-01-01
Supplement: d0an02277b1.pdf [file d0an02277b1.pdf]

# Supplementary Information

## A Site-Specific DNA Methylation Biosensor for Both Visual and Magnetic Determination Based on Lateral Flow Assay

Jiaxing Zhang,<sup>‡a</sup> Xiaonan Liu,<sup>‡a</sup> Sinong Zhang,<sup>a</sup> Yu Cai,<sup>a</sup> Kang Ma,<sup>a</sup> Kai Hua,<sup>a</sup> Yali Cui,<sup>\*a</sup>

<sup>a</sup>. College of Life Sciences, Northwest University, Xi'an, 710069, China.

E-mail: yalicui@nwu.edu.cn.

<sup>‡</sup> Contributed equally.

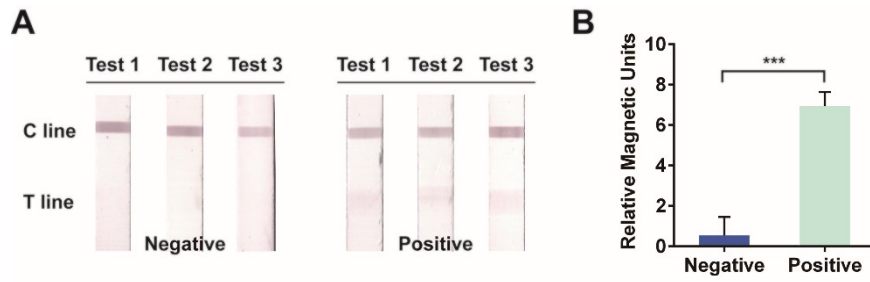

**Fig. S1.** (A) The optical signal intensity of negative result and the lowest signal intensity observed by naked eyes for positive result. (B) Magnetic signal value on T line of negative and positive result interpretation, respectively (t-test with one-tailed distribution was adopted for statistical analysis. P value of less than 0.05 was considered as statistically significant. \*\*\*P=0.000355<0.001).

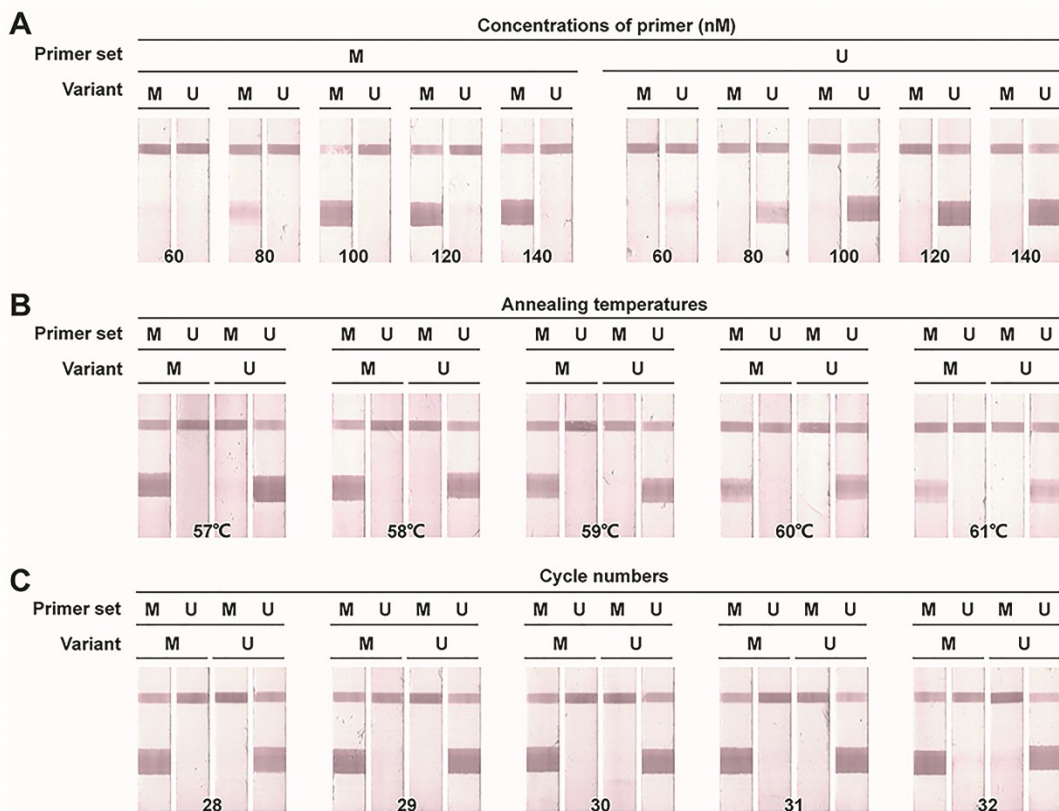

**Fig. S2.** The signal intensity of MS-LFA with different (A) concentrations of primer, (B)

annealing temperatures and (C) amplification cycle numbers.

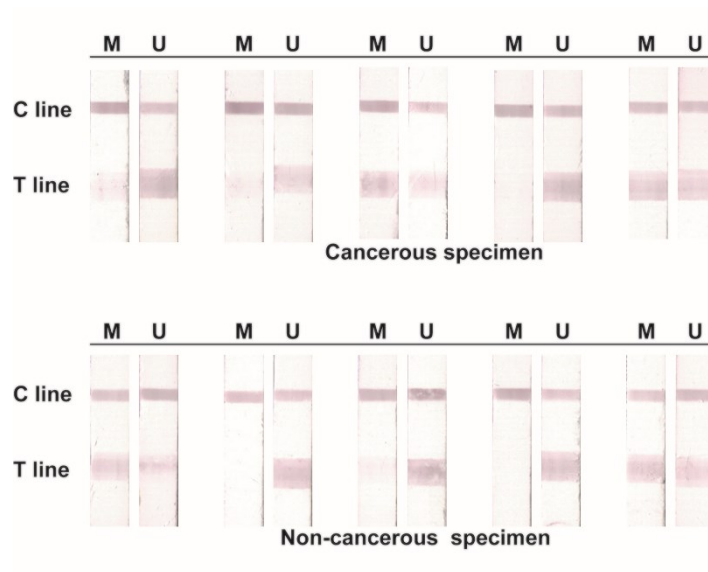

**Fig. S3.** Methylation status identification result provide by MS-LFA with clinical samples.
